# Supplementary material
Source: PubMed Central journal article supplement (PMC3967033)
Supplement: supp_tpc.113.119362_tpc119362_Supplemental_Data.pdf [file supp_tpc.113.119362_tpc119362_Supplemental_Data.pdf]

```

LHK1  N T S A I D Q E T F A E Y T A R T A F E R P L M S G V A Y A Q R V V H S E R E R F E K Q H G W V I K T M E R -----
LHK1A N P S A I D E E T F A E Y T A R T A F E R P L L S G V A Y A Q R V I N S E R E R F E K Q H G W V I K T M E R -----
AHK4  N P S A I D Q E T F A E Y T A R T A F E R P L L S G V A Y A E K V V N F E R E M F E R Q H N W V I K T M D R G -----
LHK2  N P S A V D Q K I F G E Y T E S T A F E R P L T S G V A Y A F K V L H S E R I H F E N Q H G W T I K K M E S E N E -- A
LHK3  N P S T I D Q R T F A R Y T D R T A F E R P L T S G V A Y A V R V L Q S E R E Q F E K Q Q G W T I K R M D T V E Q N P V

LHK1  -----V P S G V R D E Y A A V I F A Q E T V S Y L E S I D M M S G E E D R E N I L R A R A T G K A V L T S *
LHK1A -----E S S Q V R D E Y A P V I F A Q E T V S Y L E S L D M M S G E E D Q E N I L R A R A T G K A V L T S
AHK4  -----E P S P V R D E Y A P V I F S Q D S V S Y L E S L D M M S G E E D R E N I L R A R E T G K A V L T S
LHK2  L V Q D C I P E N L D P A P I Q D E Y A P V I F A Q E T V S H I V S I D M M S G K E D R E N I L R A R A S G K G V L T S
LHK3  H K D D Y A P E K L E P S P I Q E E Y A P V I F A Q D T V S H V I S V D V L S G K E D R G N V L R A R E S G K A V L T A

LHK1  ** P F R L L D S H H L G V V L T F P V Y K S K L P P E P T T E E V I K A I A G Y I G G S F D V E S L V E N L L G Q L A G N
LHK1A P F R L L G S H H L G V V L T F P V Y K S K L P P K P T L E E R I E A T A G Y V G G S F D V E S L V E N L L G Q L A G N
AHK4  P F R L L E T H H L G V V L T F P V Y K S S L P E N P T V E E R I A A T A G Y L G G A F D V E S L V E N L L G Q L A G N
LHK2  P F K L L K S N H L G V V L T F A V Y N S K L P P D A T V E Q R V E A T V G Y L G A S Y D I P S L V D K L L H Q L A S K
LHK3  P F R L L K T N R L G V I L T F A V Y K K D L P S N A T P N E R I Q A T D G Y L G G V F H V E S L V D K L L Q Q L A S K

LHK1  Q A I L V K V Y D I T N S S D P L I M Y G S Q Y E E G D M S L V H E S K L D F G D P Y R K H H M I
LHK1A Q A I L V N V Y D I T N C S N P L T M Y G N H S E E A D M S L S Y E S K L D F G D P Y R I H Q M I
AHK4  Q A I V V H V Y D I T N A S D P L V M Y G N Q D E E A D R S L S H E S K L D F G D P F R K H K M I
LHK2  Q T I V V N V Y D T T N A S S P I A M Y G -- T D V A D T G L L K I R S I D F G D P L R K H E M H
LHK3  Q T V N V D V Y D T T N H T H P I A M Y G -- S N V S R D A F Y H V S S L N F G D P F R K H E M H

```

**Supplemental Figure 1. Amino-Acid Sequence Alignment of Protein Regions Containing the CHASE Domain, as Predicted for *L. japonicus* LHKs and *Arabidopsis* AHK4.** The alignment was created using CLUSTALW2 and analyzed by the BoxShade software. A threshold of  $\geq 80\%$  conservation was used. Green shading indicates identical residues, whereas yellow indicates conservative substitutions. Asterisks denote conserved amino-acid positions corresponding to the *Arabidopsis* AHK4 receptor residues W244, T301, F304, R305 and T3017, all shown to be important for cytokinin binding (Heyl et al., 2007).

H  
\*

LHK1 AKSQFLATVSHEIRTPMNGILGMLGLLLRTELSSQRDYAQTAAACGKALIALINEVLDLDR  
LHK1A AKSQFLATVSHEIRTPMNGILGMMALLLDTELSSQRDYAQTAAACGKALITLINEVLDLDR  
AHK4 AKSQFLATVSHEIRTPMNGILGMLAMLLDTELSSQRDYAQTAAACGKALIALINEVLDLDR  
LHK3 AKSQFLATVSHEIRTPMNGVLGMLHMLMDTDLVDVITQEEYVRTAQDSGKSLVSLINEVLDLQ  
LHK2 AKSQFLATVSHEIRTPTTGVLGMLQMLMDTDLDENQMDCAQTAHMSGKDLISVINEVLDLQ

N

LHK1 AKIEAGKLELEAVPFDLRSILDDVLSLFSEKSRHKGLELAVFVSDKVPDILMGGDPGRFRQ  
LHK1A AKIEAGKLELEAVPFDLRSILDDVLSLFSEKSRHKSLELAVFVSDKVPDILMGGDPGRFRQ  
AHK4 AKIEAGKLELESVPFDIRSILDDVLSLFSEESRNKSIELAVFVSDKVPDILMGGDPGRFRQ  
LHK3 AKIEFGKLELEAVLFDVRAILDDVLSLFSEKSAQAGLELAVFVSDQVPELLIGDPGRFRQ  
LHK2 AKIEANKLELEVVSFDPRAILDEVLSIFSEKSENEKGIELAVYASNLVPEVVTGDFKFRFRQ

N *lhk3-1*

LHK1 IIVTNLVGNSVKFT-ERGHIFVKVHLAEKRQCTMNGKCETFLNNGCDDVLHVSGSYNLKTL  
LHK1A IITNLVGNVSKFT-EQGHIFVKVHLEDNINPVMNGKHETILNGESDEVFHLSGDCHFKTL  
AHK4 IITNLVGNVSKFT-EKGHIFVKVHLAEQSKDESEPK-NALNGGVSEEMIVVSKQSSYNTL  
LHK3 IITNLMGNSIKFT-DKGHVFTIHLVEEVVHSEVVDKEPNSD-----KNTL  
LHK2 IITNLVGNVSKFTDKGHVFSIHLANEVKNPLHIMDAVLRGCVNLN--QDLSDKTYNTL

G1

LHK1 SGYEAADERNSWDNFKHHIADEEFFFDASVKKLASESEYEQVTLMVSVEDTGTIGIFSAQ  
LHK1A SGCEAVDEQNSWENFKHLIANEERYFDCSSKMAATSESEEQVKLRVCVEDTGTIGIFSAQ  
AHK4 SGYEAADGRNSWDSFKHLVSEEQ-----SLSEFDISSNVRLMVSIEDTGTIGIFLVAQ  
LHK3 SGFPVADIRKSWEGFKAFSQEGPLG-----SFSSSSS-DFINLIVSVEDTGTIGIFLEAQ  
LHK2 SGFPVGNRWKSWATERKLN-----LNLMDPEPMIQLLVTVEDTGTIGIFTDVQ

F G2 *lhk2-5*

LHK1 DSIFMPFVQADSSTRNYGGTGIGLSISKCLVELMGGQINFISRPQVGFSTFSFTADEFGTF  
LHK1A DTIFMPFVQADSSTRNYGGTGIGLSISKCLVELMGGQINFISRPQVGFSTFSFTADEFGMF  
AHK4 GRVIFMPFVQADSSTRNYGGTGIGLSISKCLVELMRGQINFISRPQVGFSTFSFTADEFLEKC  
LHK3 SRIFTFPMQVGPISIRTHGGTGIGLSISKCLVGLMKGEIGFSSTFPKVGSTFTTAVFSNG  
LHK2 SRIFTFPMQADSSTRTYGGTGIGLSISKCLVGLMGGEIGFVSEFPGIGSTFSFTGHERKG

LHK1 KKN-STDMKKNLFEDLP--SSFRGLKAIIVVDGKPVRAAVTRYHLKRLGIQAKVAISINK  
LHK1A KKN-SVSDMKKNLEDLP--SSFRGLKVIIVVDGKPVRAAVTRYLLKRLGILMVKVANSISQ  
AHK4 DKCSAINHMKKNVEHLP--STFKGMKAIIVVDGKPVRAAVTRYHMKRLGINVDVVTSLKT  
LHK3 MQPAE-----RKNDNNQPIFSEFRGMKAVVVDHRPARAKVSWYHFQRLGIRVEVPRVEQ  
LHK2 EATSLDAKWWKYNL----FASEFQGLKALVIDRRKIRGEVTRYHLQRLGISVDVVSFSLKS

LHK1 AVSLCG---KNGSLTSALFPDIIIFVEKDSWVSGED-----GGIFNAF---KMPQ  
LHK1A AVALCG---KNGSLTSGMFQPDIIIMVEKDTWISGEHGGFNWKLDFKQNGHVF---KMPK  
AHK4 AVVAAAFAFERNGSPLPTKPOLDMILVEKDSWISTEDNDSEIRLLNSRTNGNVHH--KSPK  
LHK3 GLSTIG-----NGSIVTNMVLIEEAVWDRDSGMSSHFVKNTRKVDN-----GVPPK  
LHK2 ACTCLS---NTCNTSISMQVAMILIDKDSWDKESSILYTIKKHRENGTKGDP--ASFPK

LHK1 MILLATNICNAEFDKAKAAGFSDTVIMKPLRASMLAACLOQVFGTGKTRQFGKDMSSNGS-  
LHK1A MILLATNIKNTEFDQAKATGFTDTVIMKPLRSSMVAACLOQVILGIGKKRQLGQDMLNGSS  
AHK4 LALFATNITNSEFDRAKSAGFADTVIMKPLRASMGACLOQVLELRKTRQQHPEG-SSPA  
LHK3 LILLANSVSSISEALCTGIDPPIVIVKPLRASMLAATLQRLGIG-IREPPQHKGPPAL  
LHK2 IFFLLATHLSSSERDELKSAGIIDILMKPLWPSVLIHYHRESLGTRKKQINRKRV----S

LHK1 SVRSLLCGKK  
LHK1A FLQSLLYGKK  
AHK4 TLKSLLTGKK  
LHK3 SLRQLLLGRK  
LHK2 KLGSLLSDKQ

**Supplemental Figure 2. Amino-Acid Sequence Alignment of the Protein Kinase Domains, as Predicted for *L. japonicus* LHK Proteins and Compared to *Arabidopsis* AHK4.** The conserved H, N, G1, F, and G2 box motifs are indicated. An asterisk denotes the presence of a conserved histidine (H) residue required for the phosphorelay. Boxed and highlighted R and G residues correspond to positions of *lhk3-1* and *lhk2-5* mutations, respectively. The alignment was created as described in the legend for the supplementary Figure 1.

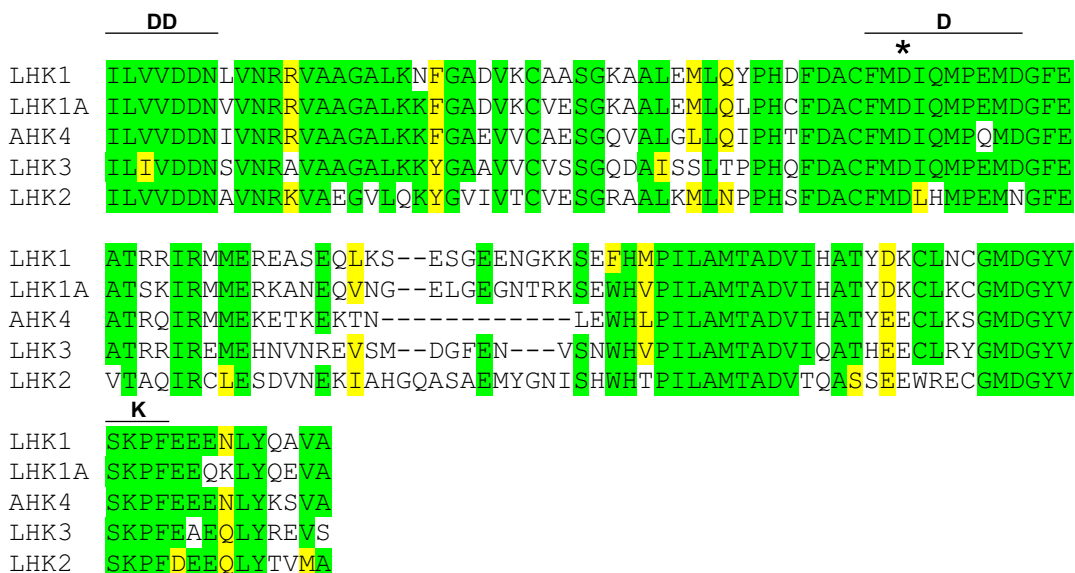

**Supplemental Figure 3. Amino-Acid Sequence Alignment of the Receiver Domains, as Predicted for *L. japonicus* LHK Proteins and *Arabidopsis* AHK4.** The conserved DD, D, and K motifs are indicated. An asterisk denotes the presence of a conserved aspartic acid (D) residue required for the phosphorelay. The alignment was created as described in the legend for the supplemental Figure 1.

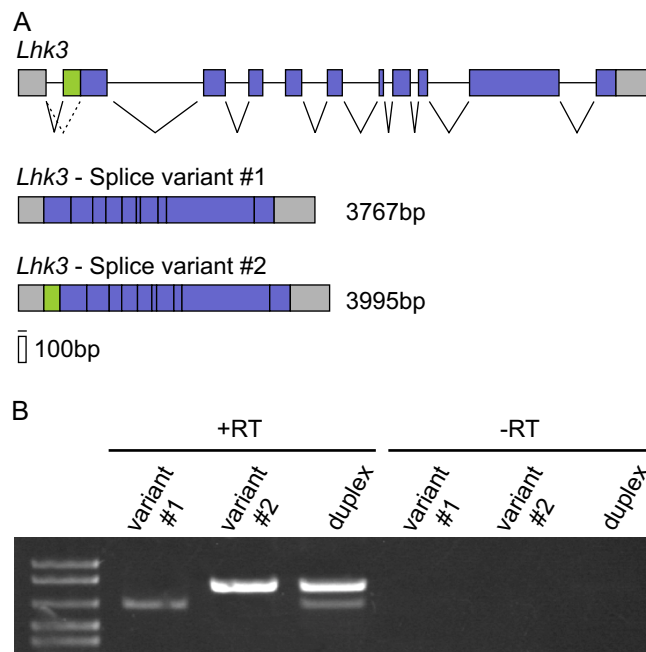

**Supplemental Figure 4. Alternative Splicing of *Lhk3*.** (A) Alternative splicing at the intron 1/exon 2 junction of the *Lhk3* locus results in the production of two *Lhk3* splice variants (named *Lhk3* - splice variant #1 (dashed line) and #2, differing by 228bp (green box). (B) RT-PCR and transcript-specific primers were used to detect and sequence these two splice variants from the *L. japonicus* nodule RNA.

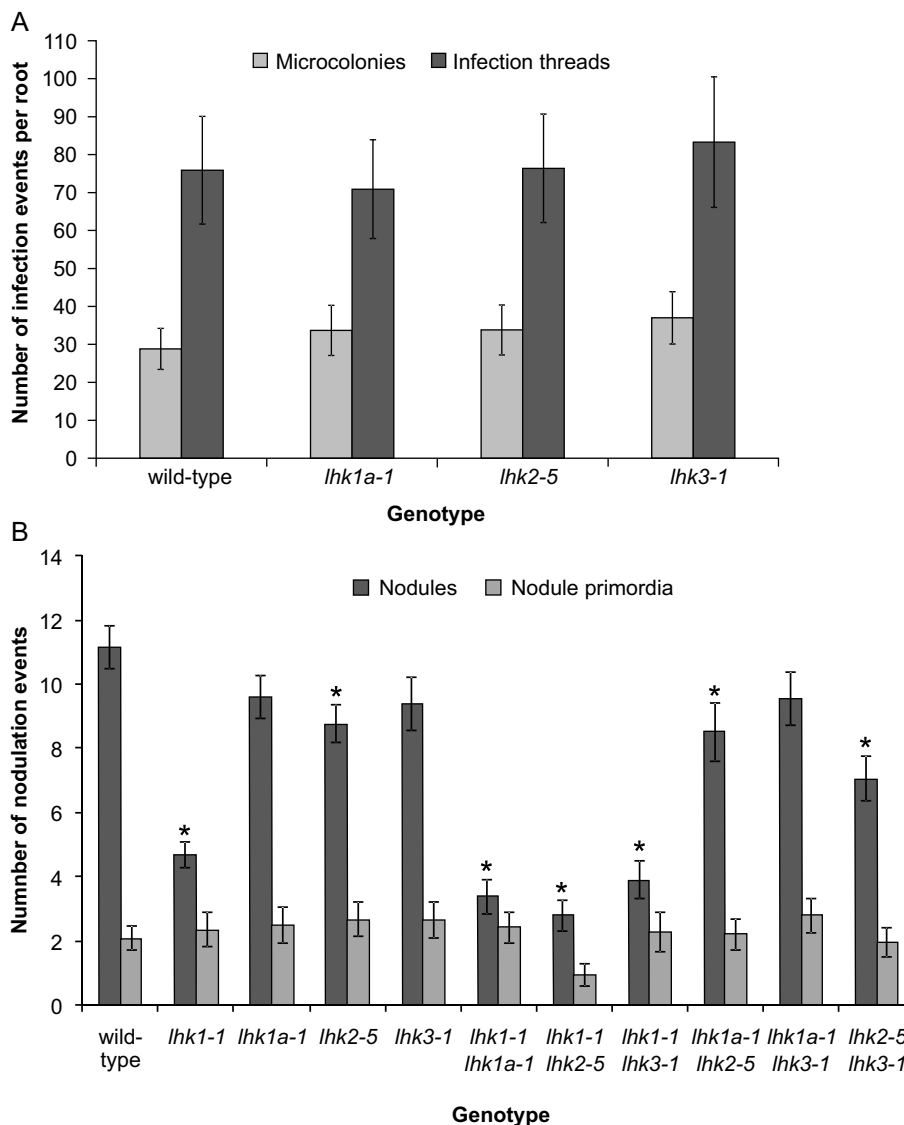

**Supplemental Figure 5. Bacterial Infection and Nodule Formation are Mostly Unaffected by *lhk1a-1*, *lhk2-5* and *lhk3-1* Mutations.** (A) The number of microcolonies and infection threads was scored in *lhk* single mutants at 7 dai with the *M. loti* strain tagged with the *hemA::LacZ* reporter and this was compared to the *L. japonicus* Gifu wild-type control. In all cases, values reported are the mean  $\pm$  95% CI (n = 10). (B) Nodule and nodule primordia formation in *lhk1-1*, *lhk1a-1*, *lhk2-5*, and *lhk3-1* single and the corresponding double mutants were scored 21 dai. In all cases, values reported represent the mean  $\pm$  95% CI (n = 29-50). An asterisk denotes significant differences between the mutant and wild-type control (Student's t-Test, P<0.05).

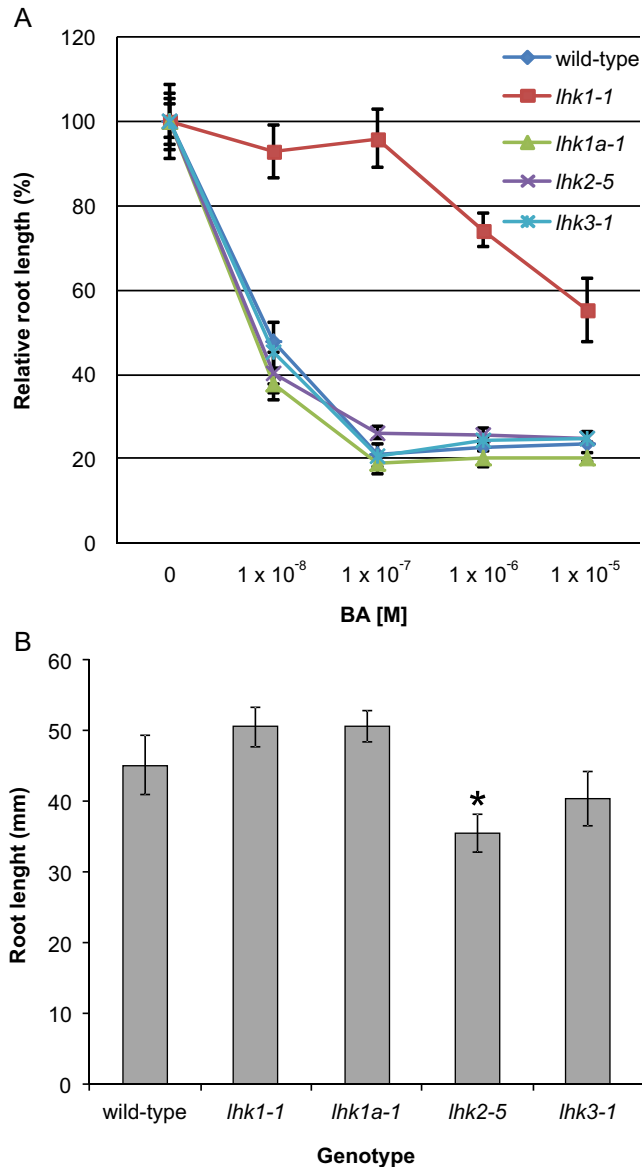

**Supplemental Figure 6. Responses of the *L. japonicus* Wild-Type and *lhk* Mutant Roots to Exogenous Cytokinin and Root Growth.** (A) Plants were grown on the surface of agar plates in the dark, in the presence of increasing concentrations of cytokinin (BA). The root length was measured 7 days after sowing. The relative root length is given, where the length of control roots that were grown in the absence of BA was set as 100%. BA: 6-benzylaminopurine. (B) The average length of control, untreated roots for given genotypes are shown. Values in panels (A) and (B) represent the mean  $\pm$  95% CI ( $n \geq 10$ ). An asterisk denotes significant difference with the wild-type value (Student's t-Test,  $P < 0.05$ ).

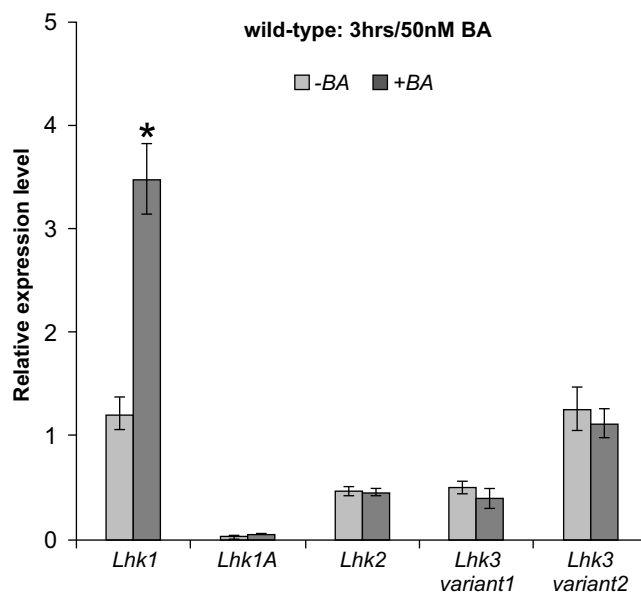

**Supplemental Figure 7. Ectopic cytokinin Increases the Steady-State Level of the *Lhk1* mRNA.** The relative steady-state levels of *Lhk1*, *1A*, *2* and *3* transcripts in un-treated (-BA) and cytokinin treated (+BA) *L. japonicus* roots are given. Values (mean  $\pm$  SE of three biological replicates) for *L. japonicus* wild-type roots that were incubated in H<sub>2</sub>O or H<sub>2</sub>O supplemented with 50nM BA for 3 hours are shown. An asterisk denotes significant difference (Student's t-Test, P < 0.05).



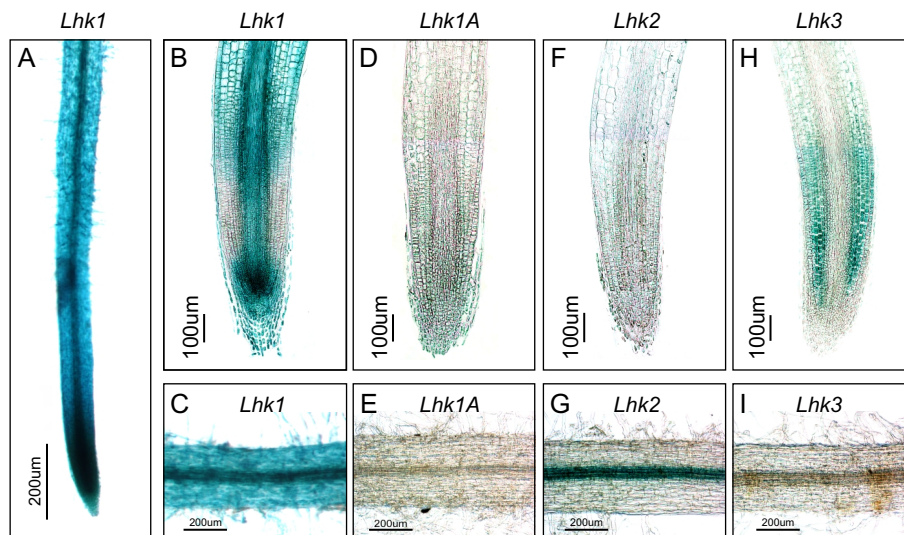

**Supplemental Figure 8. Activities of *Lhk1*, *1A*, *2* and *3* Promoters in Uninoculated *L. japonicus* Roots.** Whole mounts (**A**, **C**, **E**, **G** and **I**) and 35 µm thick longitudinal sections (**B**, **D**, **F** and **H**) are shown. *Lhk1*<sub>pro</sub>::*GUS* activity in *L. japonicus* root (**A**), root apical region (**B**) and a root segment within a zone susceptible to *M. loti* infection approx. 2-5 mm above the root tip (**C**). Activities of *Lhk1A*<sub>pro</sub>::*GUS* (**D** and **E**), *Lhk2*<sub>pro</sub>::*GUS* (**F** and **G**) and *Lhk3*<sub>pro</sub>::*GUS* (**H** and **I**) reporter constructs in the corresponding apical and root susceptible zones. All images represent specimens collected at 7 or 14 days after sowing.

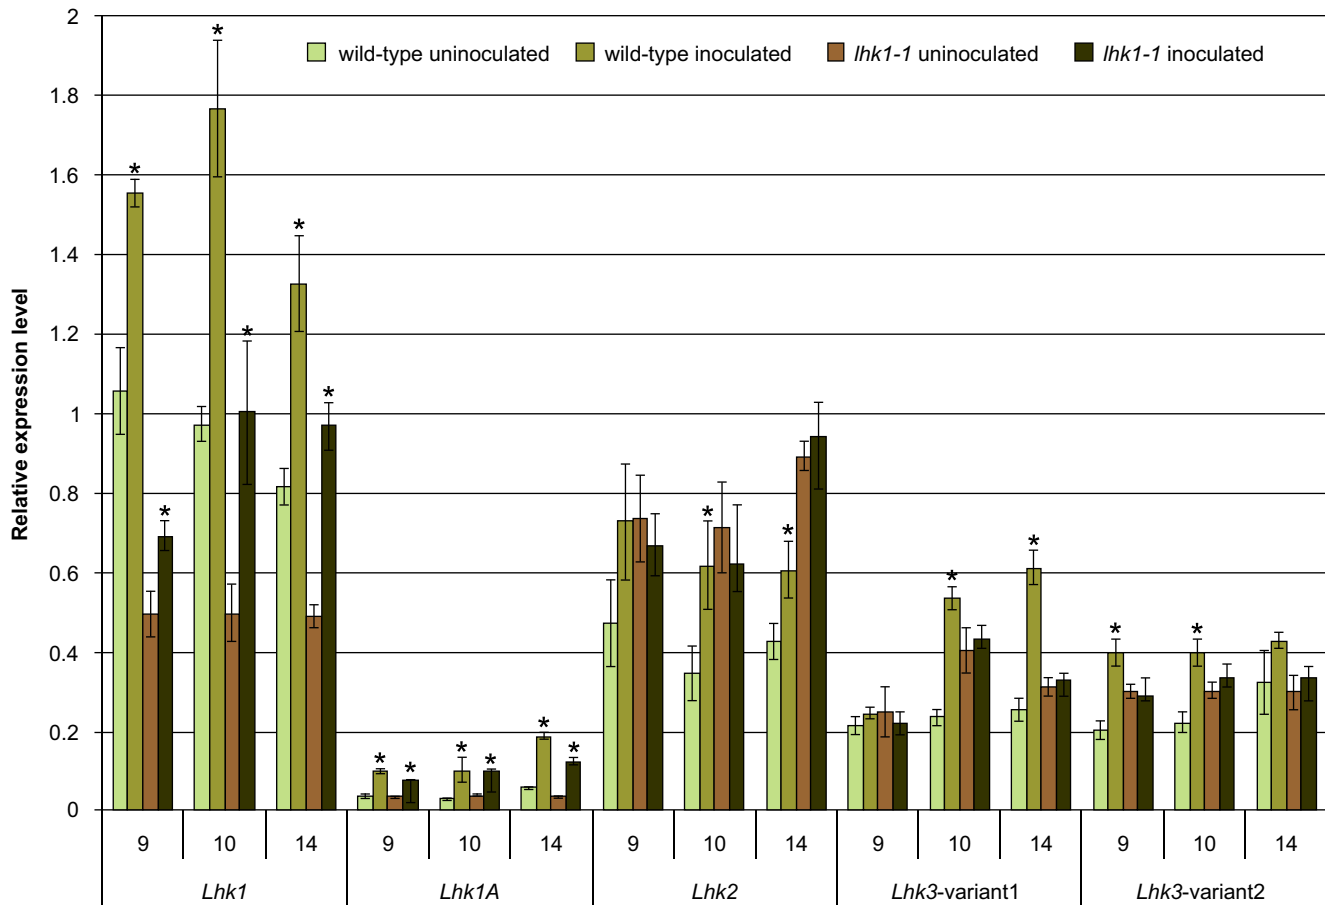

**Supplemental Figure 9. All Four *Lhks* Respond to *M. loti* Inoculation.** The relative steady-state levels of all four *Lhk* transcripts in uninoculated roots and roots of the same age harvested 9, 10 and 14 days after sowing are given. Note that plants were inoculated with *M. loti* 7 days after sowing such that each of the time points (i.e. 9, 10 and 14) reflect the measurements at 2, 3 and 7 dai, respectively, for the inoculated samples. Average values for three biological replicates  $\pm$  SE are given. Asterisks denote significant differences between the corresponding inoculated and un-inoculated samples (Student's t-Test,  $P < 0.05$ ).

A

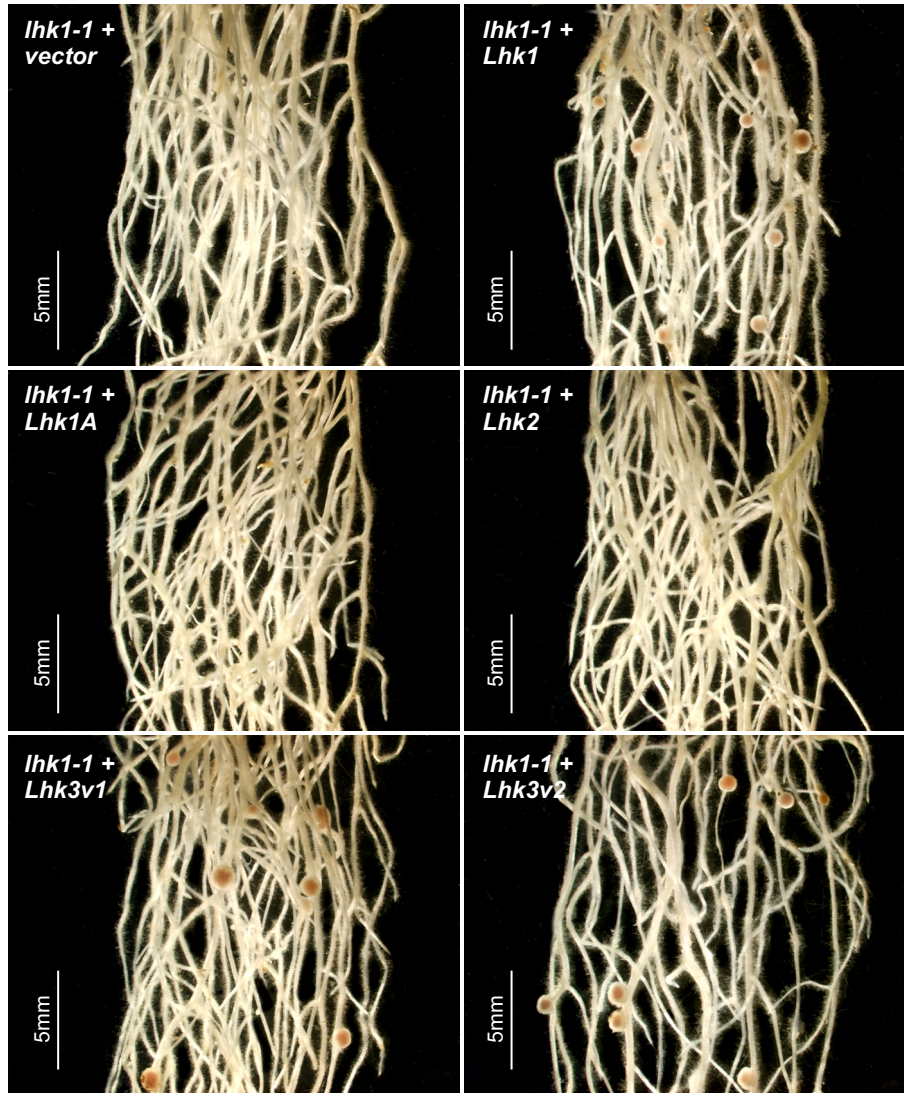

B

|                                 | Total # of plants | # Nodulated plants | Nodules/nodulated plant |
|---------------------------------|-------------------|--------------------|-------------------------|
| <i>lhk1-1 + vector</i>          | 32                | 0                  | 0                       |
| <i>lhk1-1 + Lhk1</i>            | 20                | 16                 | 17.8 ± 2.0              |
| <i>lhk1-1 + Lhk1A</i>           | 29                | 0                  | 0                       |
| <i>lhk1-1 + Lhk2</i>            | 3                 | 0                  | 0                       |
| <i>lhk1-1 + Lhk3 variant #1</i> | 30                | 25                 | 15.8 ± 2.7              |
| <i>lhk1-1 + Lhk3 variant #2</i> | 21                | 10                 | 5.8 ± 1.4               |

**Supplemental Figure 10. *Lhk3* Functionally Replaces *Lhk1*.** The five *Lhk* cDNAs (*Lhk1*, *Lhk1A*, *Lhk2*, *Lhk3v1* and *Lhk3v2*) were expressed under the control of *CaMV* 35S promoter in the *lhk1-1* mutant background via *A. rhizogenes*-mediated hairy-root transformation. (A) Representative images of transgenic hairy roots are shown at 21 dai with *M. loti*. (B) Quantitative data for plants used and nodule frequency obtained are given. For *Lhk2*, only 3 plants were scored due to an apparent suppression of hairy root formation. In all cases, values represent the mean  $\pm$  95% CI (confidence interval).

**Supplemental Table 1.** Amino Acid Conservation among *L. japonicus* LHK Proteins and with Their Presumed *Arabidopsis* Counterparts.

| Name  | Length | Name  | Length | Identity (%) | Similarity (%) |
|-------|--------|-------|--------|--------------|----------------|
| LHK1  | 993    | LHK1A | 997    | 80           | 86             |
| LHK1  | 993    | LHK2  | 1218   | 52           | 67             |
| LHK1  | 993    | LHK3  | 986    | 49           | 66             |
| LHK1  | 993    | AHK4  | 1057   | 68           | 78             |
| LHK1A | 997    | LHK2  | 1218   | 53           | 68             |
| LHK1A | 997    | LHK3  | 986    | 51           | 68             |
| LHK1A | 997    | AHK4  | 1057   | 69           | 79             |
| LHK2  | 1218   | LHK3  | 986    | 54           | 69             |
| LHK2  | 1218   | AHK2  | 1176   | 59           | 71             |
| LHK3  | 986    | AHK3  | 1036   | 68           | 80             |

**Supplemental Table 2.** A list of *lhk1a*, 2 and 3 Mutant Alleles as Identified by a TILLING Approach. gDNA: genomic DNA mutation for a given locus; ORF change: the resulting alteration to the open reading frame. Adenine in the predicted ATG initiation codon was set as 1 for defining the position of a given mutation in gDNA. Similarly, a predicted initiating methionine residue was set as 1 to calculate the position of any given amino-acid change.

| Line number | Allele name     | Mutation (gDNA)       | ORF change              |
|-------------|-----------------|-----------------------|-------------------------|
| SL761-1     | <i>lhk1a-1</i>  | G <sub>4439</sub> - A | W <sub>565</sub> - STOP |
| SL1481-1    | <i>lhk1a-2</i>  | C <sub>4808</sub> - T | L <sub>689</sub> - F    |
| SL3496-1    | <i>lhk1a-3</i>  | C <sub>4808</sub> - T | L <sub>689</sub> - F    |
| SL4275-1    | <i>lhk1a-4</i>  | G <sub>4725</sub> - A | G <sub>661</sub> - E    |
| SL5603-1    | <i>lhk1a-5</i>  | G <sub>4929</sub> - A | S <sub>729</sub> - N    |
| SL4559-1    | <i>lhk1a-6</i>  | C <sub>4388</sub> - T | H <sub>549</sub> - T    |
| SL871-1     | <i>lhk1a-7</i>  | G <sub>3934</sub> - A | None - Intronic         |
| SL1169-1    | <i>lhk1a-8</i>  | C <sub>4504</sub> - T | None - synonymous       |
| SL3064-1    | <i>lhk1a-9</i>  | C <sub>4031</sub> - T | None - Intronic         |
| SL4389-1    | <i>lhk1a-10</i> | G <sub>4933</sub> - A | None - synonymous       |

| Line number | Allele name   | Mutation (gDNA)       | ORF change           |
|-------------|---------------|-----------------------|----------------------|
| SL4340-1    | <i>lhk2-1</i> | G <sub>5499</sub> - A | A <sub>517</sub> - T |
| SL4236-1    | <i>lhk2-2</i> | G <sub>5532</sub> - A | D <sub>528</sub> - N |
| SL404-1     | <i>lhk2-3</i> | G <sub>5547</sub> - A | E <sub>533</sub> - K |
| SL577-1     | <i>lhk2-4</i> | G <sub>5551</sub> - A | G <sub>534</sub> - D |
| SL965-1     | <i>lhk2-5</i> | G <sub>5769</sub> - A | G <sub>605</sub> - R |
| SL1482-1    | <i>lhk2-6</i> | G <sub>5817</sub> - A | A <sub>621</sub> - T |
| SL2025-1    | <i>lhk2-7</i> | G <sub>5836</sub> - A | R <sub>627</sub> - Q |
| SL5335-1    | <i>lhk2-8</i> | G <sub>5899</sub> - A | G <sub>648</sub> - E |
| SL80-1      | <i>lhk2-9</i> | G <sub>5908</sub> - A | G <sub>651</sub> - E |

| Line number | Allele name    | Mutation (gDNA)       | ORF change           |
|-------------|----------------|-----------------------|----------------------|
| SL390-1     | <i>lhk2-10</i> | G <sub>6051</sub> - A | D <sub>699</sub> - N |
| SL1428-1    | <i>lhk2-11</i> | C <sub>5645</sub> - T | None - synonymous    |
| SL1535-1    | <i>lhk2-12</i> | C <sub>5248</sub> - T | None - Intronic      |
| SL314-1     | <i>lhk2-13</i> | C <sub>5335</sub> - T | None - synonymous    |
| SL6570-1    | <i>lhk2-14</i> | C <sub>5691</sub> - T | None - synonymous    |
| SL5401-1    | <i>lhk2-15</i> | G <sub>5260</sub> - A | None - Intronic      |

  

| Line number | Allele name   | Mutation (gDNA)       | ORF Change           |
|-------------|---------------|-----------------------|----------------------|
| SL201-1     | <i>lhk3-1</i> | G <sub>4558</sub> - A | R <sub>561</sub> - Q |
| SL577-1     | <i>lhk3-2</i> | G <sub>5219</sub> - A | V <sub>596</sub> - I |
| SL1972-1    | <i>lhk3-3</i> | G <sub>6057</sub> - A | S <sub>875</sub> - N |
| SL780-1     | <i>lhk3-4</i> | C <sub>4782</sub> - T | None - Intronic      |
| SL1767-1    | <i>lhk3-5</i> | G <sub>4973</sub> - A | None - Intronic      |
